# Supplementary material for: Identification and Characterization of Two Novel RNA Viruses from Anopheles gambiae Species Complex Mosquitoes
Source: PubMed Central journal article supplement (PMC4854438; doi:10.1371/journal.pone.0153881), 2016-05-03

**A**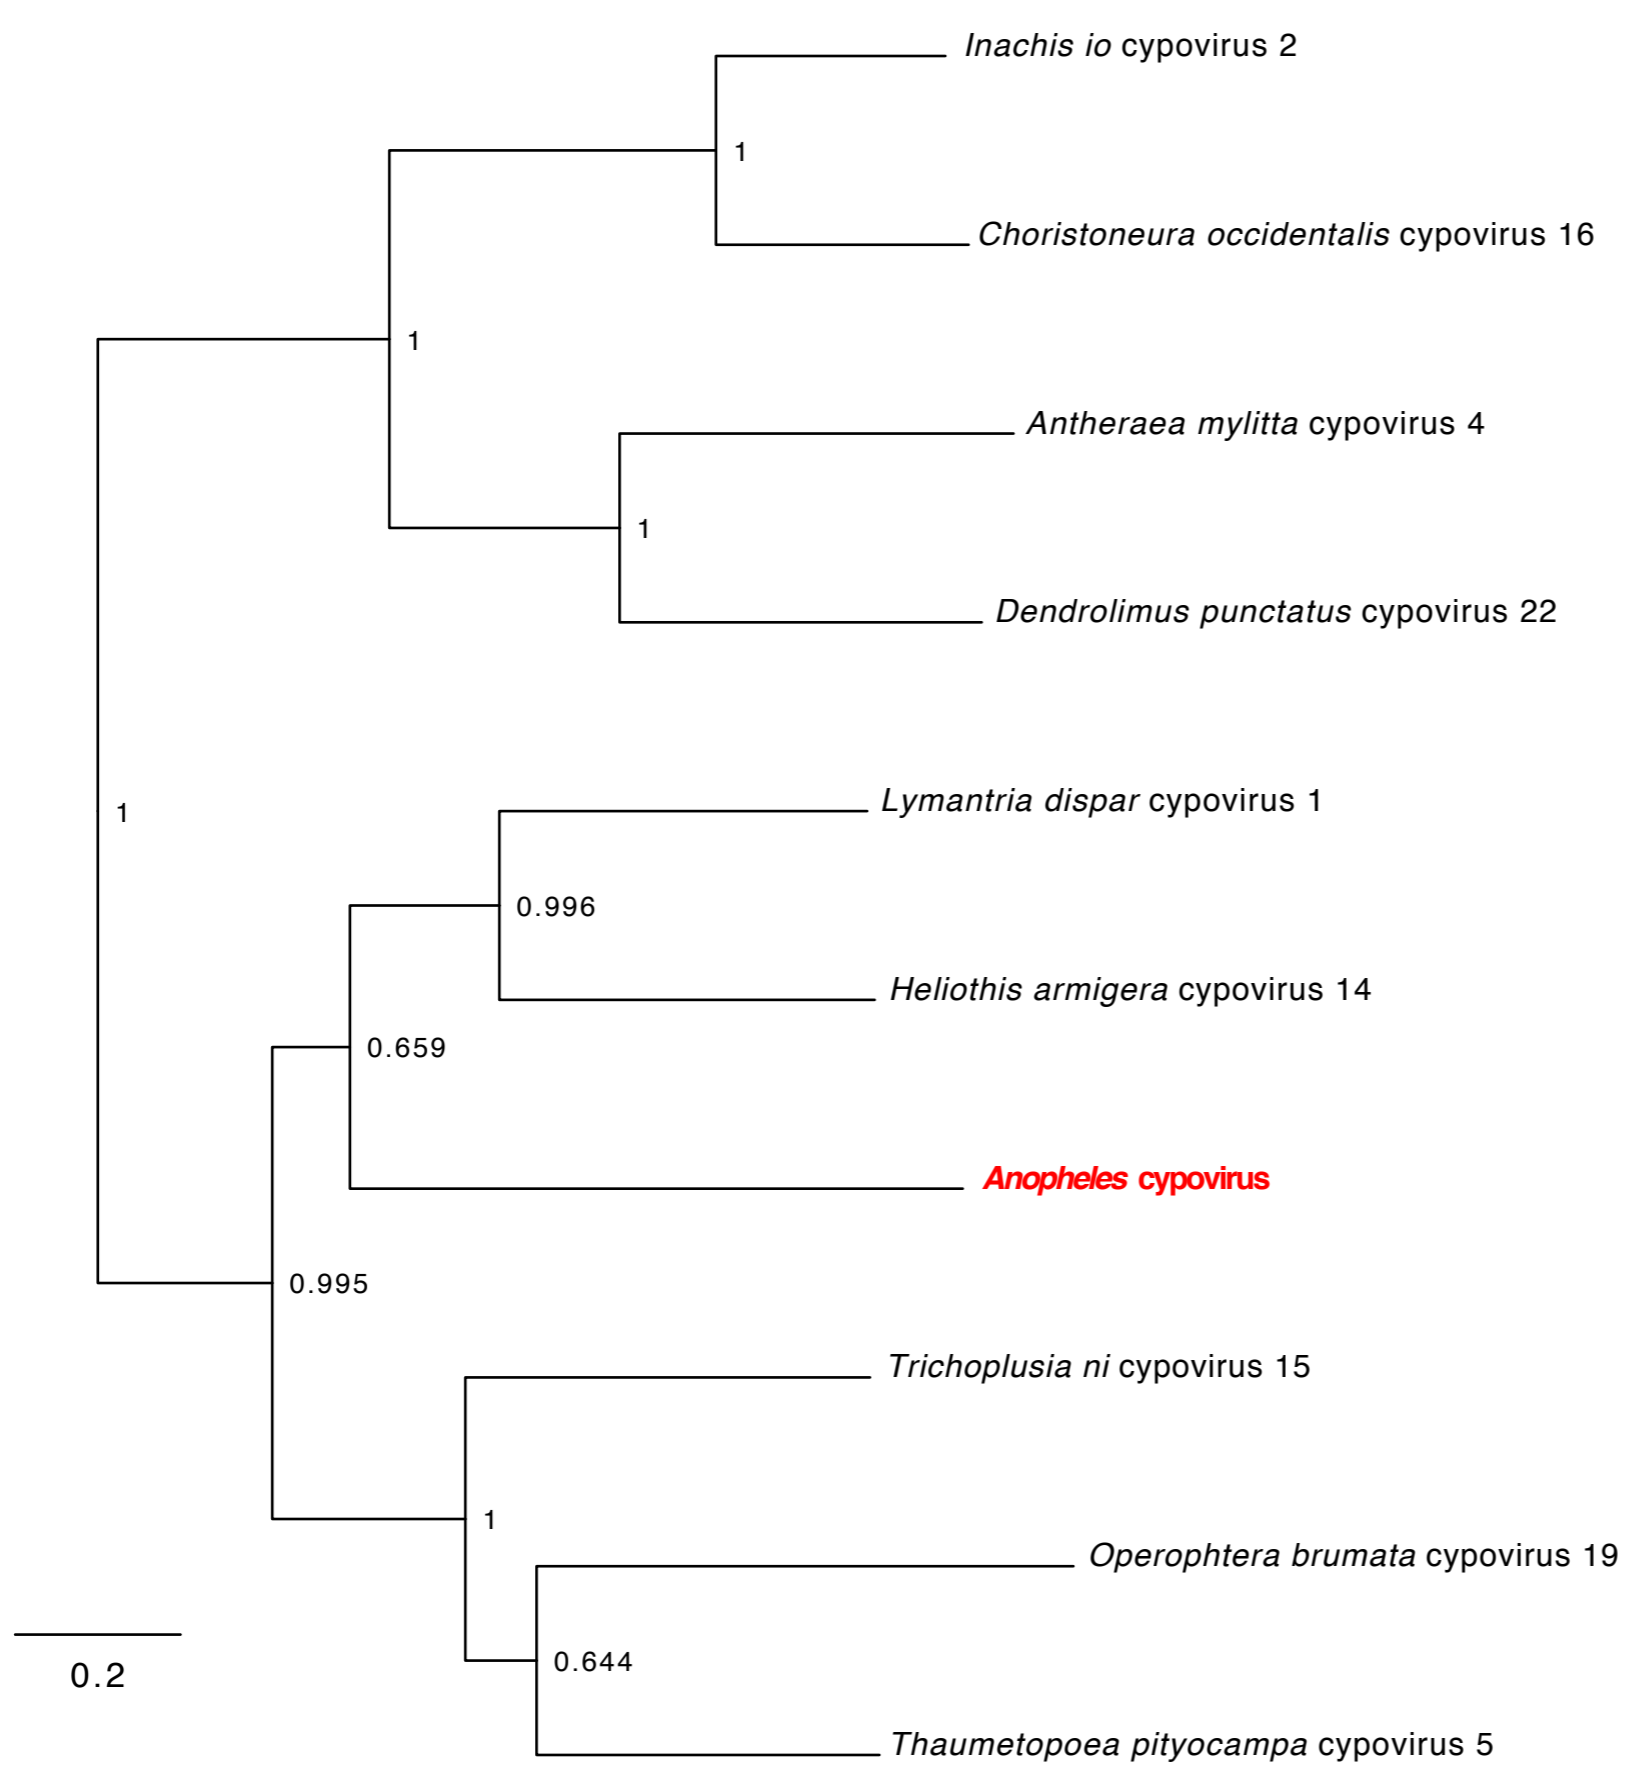**B**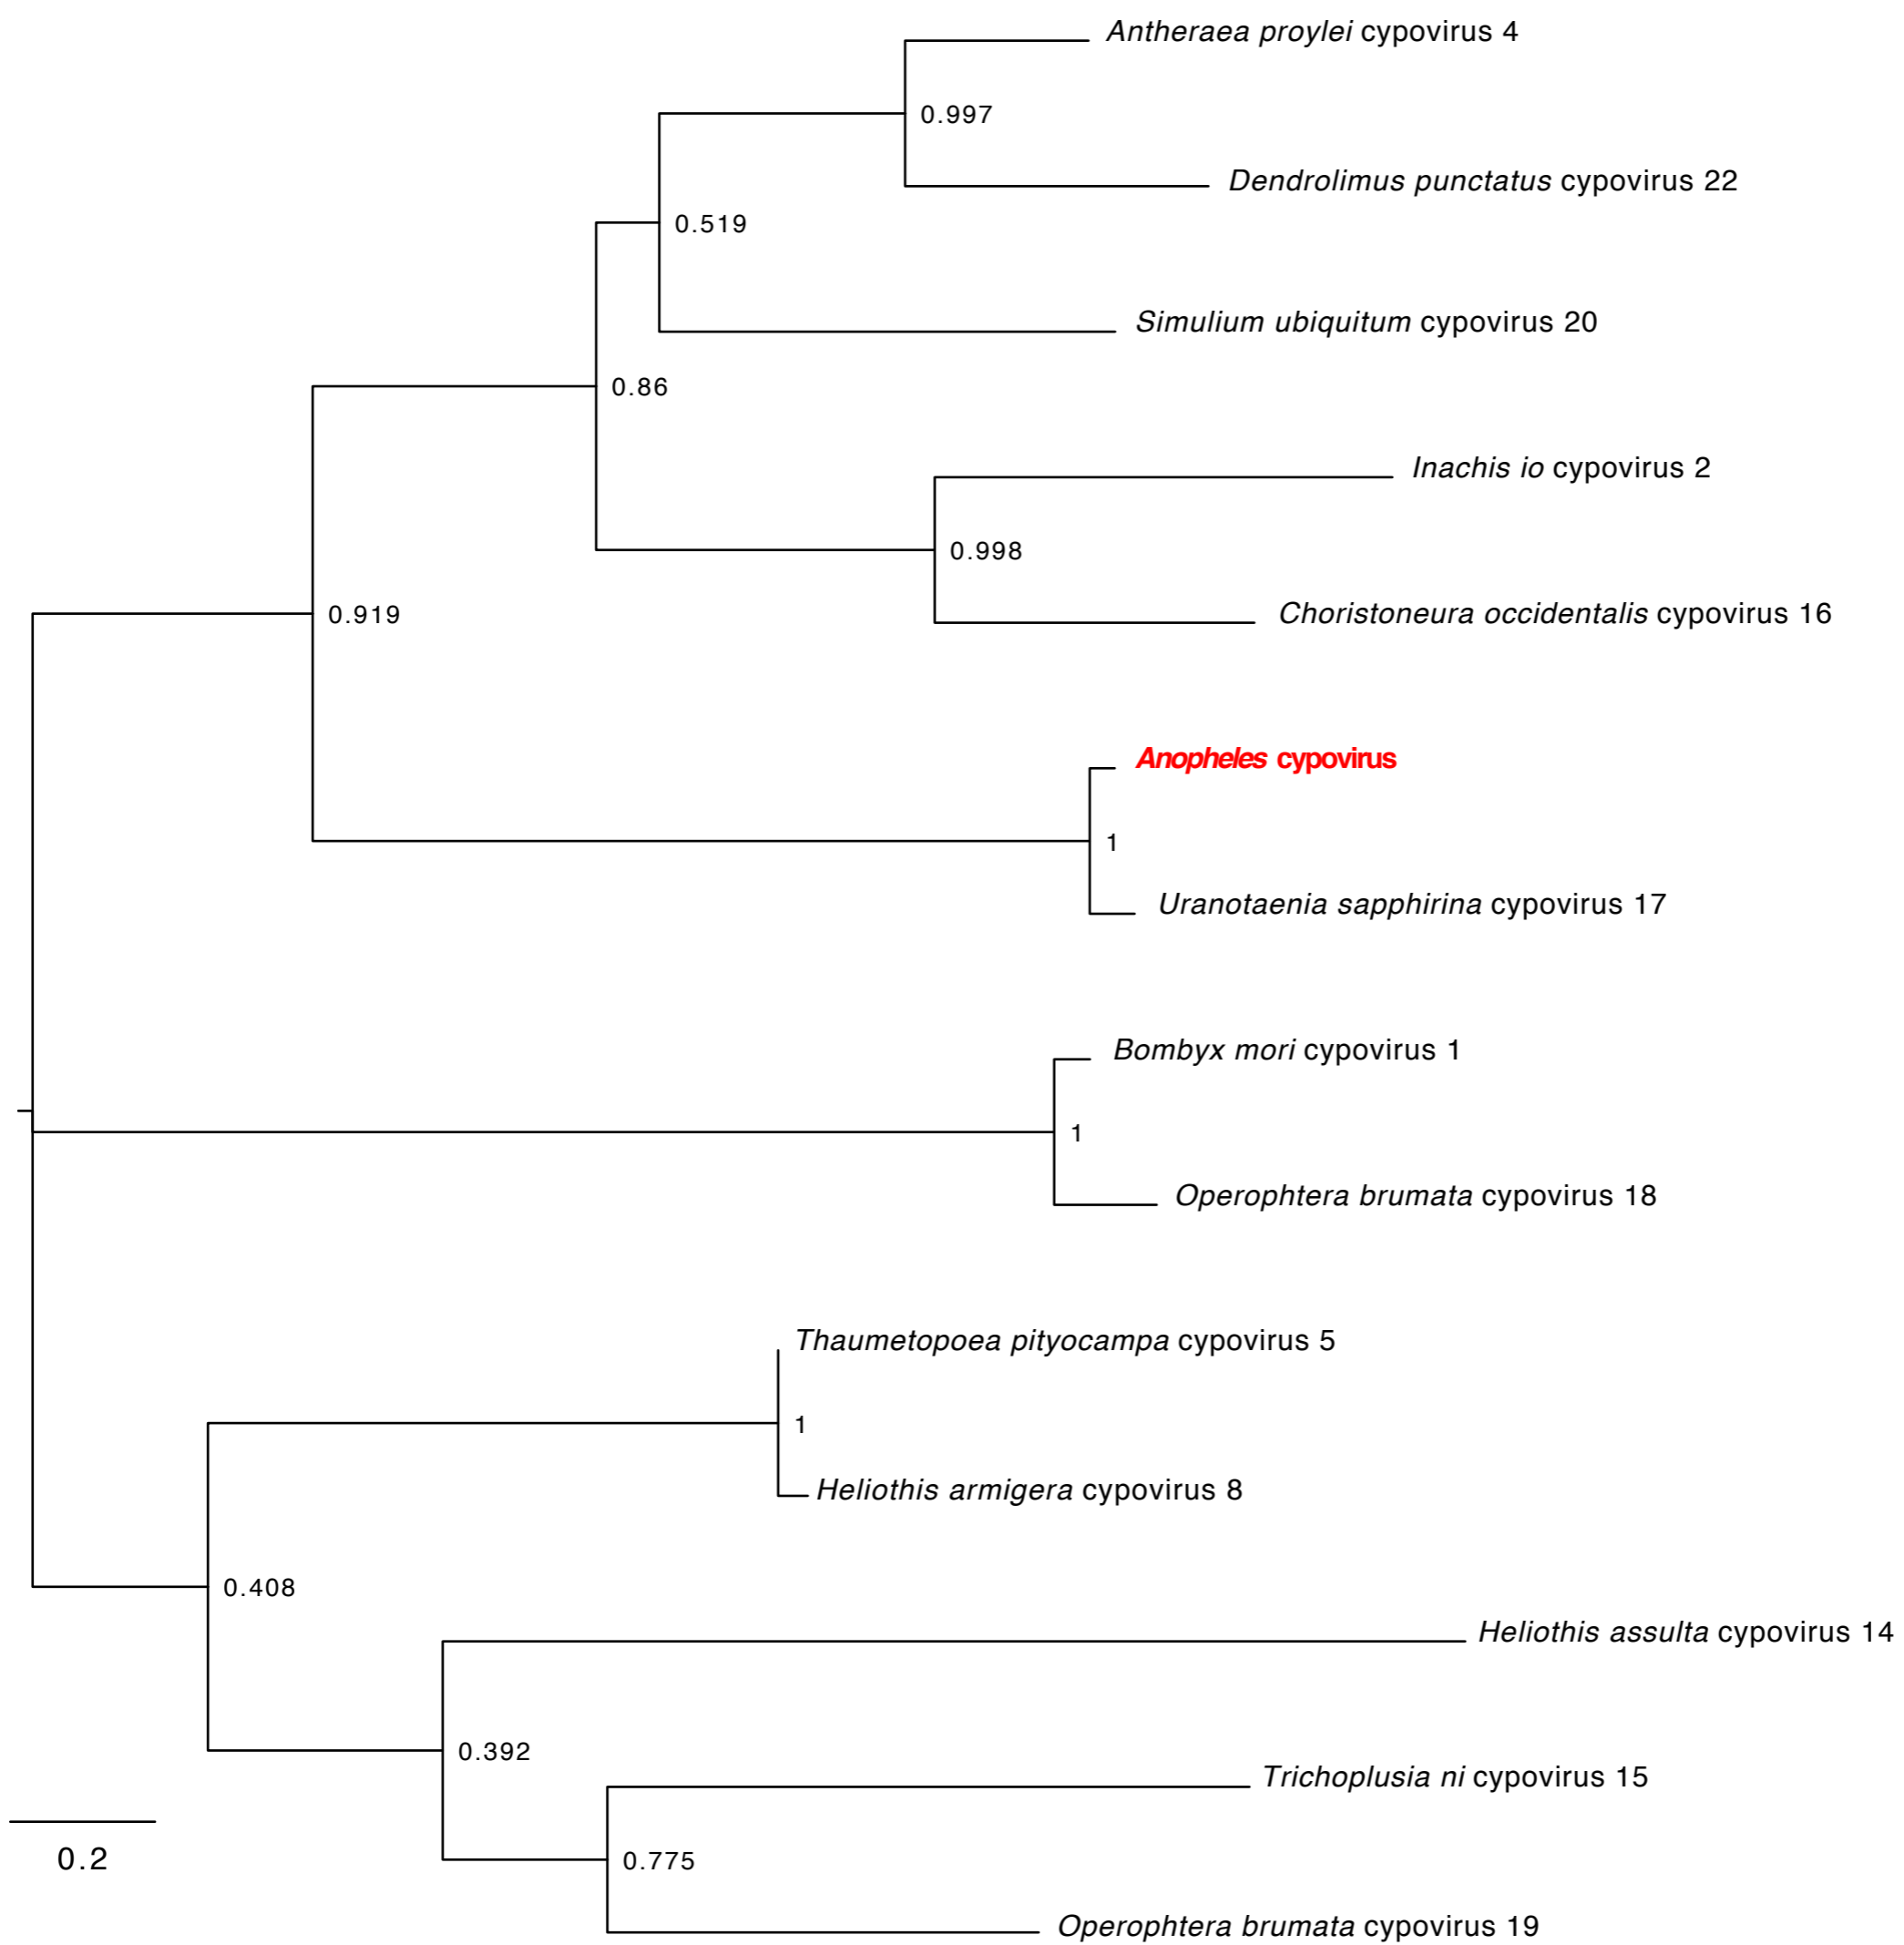

Supplement: pone.0153881.s001.pdf [file pone.0153881.s001.pdf]
