# Supplementary material for: Identification and Characterization of Two Novel RNA Viruses from Anopheles gambiae Species Complex Mosquitoes
Source: PubMed Central journal article supplement (PMC4854438; doi:10.1371/journal.pone.0153881), 2016-05-03
Supplement: pone.0153881.s003.pdf [file pone.0153881.s003.pdf]

```

+2 CPV-PCRfragment.xdna          10      20      30      40      50
-24 Ng10CPV-R                    acgcggtggtttacctgaatcacaattggaccatttacagggcggtatgaa
-28 Ng08CPV-R                    .....
-16 W35R_Senegal                  .....
-14 W32R_Cambodia                  .....
-18 W35R_Senegal                  .....
-12 W31R_Cambodia                  .....
-20 W36R_Senegal                  .....
+31 W44F_Cambodia                  .....
+27 Ng08CPV-F                    .....
+11 W31F_Cambodia                  .....
+17 W35F_Senegal                  .....
+23 Ng10CPV-F                    .....
    CONSENSUS                      ACGCGTGGTTTACCTGAATCACAATTGGACCATTTACAGGCGGTATGAA

```

```

+2 CPV-PCRfragment.xdna          60      70      80      90     100
-24 Ng10CPV-R                    gcgtcttctgcaactaagtgatgaacctggaggcggtggaagcagggttg
-28 Ng08CPV-R                    .....
-16 W34R_Senegal                  .....
-14 W32F_Cambodia                  .....
-18 W35R_Senegal                  .....
-12 W31R_Cambodia                  .....
-20 W36R_Senegal                  .....
+31 W44F_Cambodia                  .....
+27 Ng08CPV-F                    .....
+11 W31F_Cambodia                  .....
+17 W35F_Senegal                  .....
+23 Ng10CPV-F                    .....
+13 W32F_Cambodia                  .....
+19 W36F_Senegal                  .....
    CONSENSUS                      GCGTCTTCTGCAACTAAGTGATGAACCTGGTGGAGCGTGAAGCAGGTTG

```

```

+2 CPV-PCRfragment.xdna          110     120     130     140     150
-24 Ng10CPV-R                    agatgtatgtatcaggtacacttgaggccggtggtattcgaaggtagtcat
-28 Ng08CPV-R                    .....
-16 W34R_Senegal                  .....
-14 W32R_Cambodia                  .....
-18 W35R_Senegal                  .....
-12 W31R_Cambodia                  .....
-20 W36R_Senegal                  .....
+31 W44F_Cambodia                  .....
+27 Ng08CPV-F                    .....
+11 W31F_Cambodia                  .....
+17 W35F_Senegal                  .....
+23 Ng10CPV-F                    .....
+13 W32F_Cambodia                  .....
+19 W36F_Senegal                  .....
+15 W34F_Senegal                  .....
    CONSENSUS                      AGATGTATGTATCAGGTACACTTGAGGCCGTGGTATTGGAAGGTAGTCAT

```

```

+2 CPV-PCRfragment.xdna          160     170     180     190     200
-24 Ng10CPV-R                    gcactaacatcaactacttacgagagtaagatTTTTGGAAGTgtaagaa
-28 Ng08CPV-R                    .....
-16 W34R_Senegal                  .....
-14 W32R_Cambodia                  .....
-18 W35R_Senegal                  .....
-12 W31R_Cambodia                  .....
-20 W36R_Senegal                  .....
+31 W44F_Cambodia                  .....
+27 Ng08CPV-F                    .....
+11 W31F_Cambodia                  .....
+17 W35F_Senegal                  .....
+23 Ng10CPV-F                    .....
+13 W32F_Cambodia                  .....
+19 W36F_Senegal                  .....
+15 W34F_Senegal                  .....
    CONSENSUS                      GCACTAACATCAACTACTTACGAGAGTAAGATTTTTGGAAGTgTTAAGAA

```

```

                210      220      230      240      250
+2 CPV-PCRfragment.xdna ctatgcggggtacgtatccctcaggtagagctgacacgtcgtcacatcaca
-24 Ng10CPV-R .....
-28 Ng08CPV-R .....
-16 W34R_Senegal .....
-14 W32R_Cambodia .....
-18 W35R_Senegal .....
-12 W31R_Cambodia .....
-20 W36R_Senegal .....
+31 W44F_Cambodia .....
+27 Ng08CPV-F .....
+11 W31F_Cambodia .....
+17 W35F_Senegal .....
+23 Ng10CPV-F .....
+13 W32F_Cambodia .....
+19 W36F_Senegal .....
+15 W34F_Senegal .....
    CONSENSUS CTATGCGGGGTACGTATCCCTCAGGTAGAGCTGACACGTCGTACATCACA

```

```

                260      270      280      290      300
+2 CPV-PCRfragment.xdna ctaaggttttggagggtgcgaccctggtaataatgcaagaagaacg
-24 Ng10CPV-R .....
-28 Ng08CPV-R .....
-16 W34R_Senegal .....
-14 W32R_Cambodia .....
-18 W35R_Senegal .....
-12 W31R_Cambodia .....
-20 W36R_Senegal .....
+31 W44F_Cambodia .....
+27 Ng08CPV-F .....
+11 W31F_Cambodia .....
+17 W35F_Senegal .....
+23 Ng10CPV-F .....
+13 W32F_Cambodia .....
+19 W36F_Senegal .....
+15 W34F_Senegal .....
    CONSENSUS CTAAGGTTTGGAGGTGCGACCCGTGGTAATGAAATGCGAAGAAGAACG

```

```

                310      320      330      340      350
+2 CPV-PCRfragment.xdna gatgagcgaatcgtgcaccatgcgtcgacgattgtaatgtcacgtaatat
-24 Ng10CPV-R ..T.....
-28 Ng08CPV-R ..T.....
-16 W34R_Senegal .....
-14 W32R_Cambodia .....
-18 W35R_Senegal .....
-12 W31R_Cambodia .....
-20 W36R_Senegal .....
+31 W44F_Cambodia ..T.....
+27 Ng08CPV-F ..T.....
+11 W31F_Cambodia .....
+17 W35F_Senegal .....
+23 Ng10CPV-F ..T.....
+13 W32F_Cambodia .....
+19 W36F_Senegal .....
+15 W34F_Senegal .....
    CONSENSUS GACGAGCGAATCGTGCACCATGCGTCGACGATTGTAATGTCACGTAATAT

```

```

+2 CPV-PCRfragment.xdna          360      370      380      390      400
-24 Ng10CPV-R                    gggatgataagtacagacgtatacacaggatcatttccaaatgttata
-28 Ng08CPV-R                    .....R.....
-16 W34R_Senegal                  .....
-14 W32R_Cambodia                  .....
-18 W35R_Senegal                  .....
-12 W31R_Cambodia                  .....
-20 W36R_Senegal                  .....
+31 W44F_Cambodia                  .....R.....
+27 Ng08CPV-F                    .....R.....
+11 W31F_Cambodia                  .....
+17 W35F_Senegal                  .....
+23 Ng10CPV-F                    .....
+13 W32F_Cambodia                  .....
+19 W36F_Senegal                  .....
+15 W34F_Senegal                  .....
    CONSENSUS                      GGGTGTGATAAGTCAGACGTATAACAGGATCATTTCCAAATGTTATAT

```

```

+2 CPV-PCRfragment.xdna          410      420      430      440      450
-24 Ng10CPV-R                    cacaattagtgagcgataaagatgtactcgcacaattgggttttaagaca
-28 Ng08CPV-R                    .....
-16 W34R_Senegal                  .....
-14 W32R_Cambodia                  .....
-18 W35R_Senegal                  .....
-12 W31R_Cambodia                  .....
+31 W44F_Cambodia                  .....
+27 Ng08CPV-F                    .....
+11 W31F_Cambodia                  .....
+17 W35F_Senegal                  .....
+23 Ng10CPV-F                    .....
+13 W32F_Cambodia                  .....
+19 W36F_Senegal                  .....
+15 W34F_Senegal                  .....
    CONSENSUS                      CACAATTAGTGAGCGATAAAGATGTACTCGCACAAATGGGTTTTAAGACA

```

```

+2 CPV-PCRfragment.xdna          460      470      480      490      500
-24 Ng10CPV-R                    gatgcagatctctcgagtcacaacggagaattcttgcaacaacatgtatg
-28 Ng08CPV-R                    .....C.....
-14 W32R_Cambodia                  .....
-18 W35R_Senegal                  .....
-12 W31R_Cambodia                  .....
+31 W44F_Cambodia                  .....C.....
+27 Ng08CPV-F                    .....C.....
+11 W31F_Cambodia                  .....
+17 W35F_Senegal                  .....
+23 Ng10CPV-F                    .....C.....
+13 W32F_Cambodia                  .....
+19 W36F_Senegal                  .....
+15 W34F_Senegal                  .....
    CONSENSUS                      GATGCAGATCTCTCGAGTCACAATGGAGAATTC TTGCAACAACATGTATG

```

```

+2 CPV-PCRfragment.xdna          510      520
+31 W44F_Cambodia                  ....
+27 Ng08CPV-F                    ....
+11 W31F_Cambodia                  ....
+17 W35F_Senegal                  ....
+23 Ng10CPV-F                    ....
+13 W32F_Cambodia                  ....
+19 W36F_Senegal                  ....
+15 W34F_Senegal                  ....
    CONSENSUS                      TAGAGGAAGGCTAGTCGGAAAACC

```
