# Supplementary material for: Identification and Characterization of Two Novel RNA Viruses from Anopheles gambiae Species Complex Mosquitoes
Source: PubMed Central journal article supplement (PMC4854438; doi:10.1371/journal.pone.0153881), 2016-05-03
Supplement: pone.0153881.s004.pdf [file pone.0153881.s004.pdf]

```

+1 ACV-PCRfragment.xdna          10      20      30      40      50
-32 W47R_Senegal                  caaggaggctttttgagtgctcctgCGAAAGCTGTAACGATAGGACAAGA
-21 Ng10ACV-R                      .....
-25 Ng08ACV-R                      .....
-8 An.dirus4-R                    .....
-6 An.dirus3-R                    .....
+5 An.dirus3-F                    .....
+7 An.dirus4-F                    .....
+26 Ng08ACV-F                    .....
CONSENSUS                         CAAGGAGGCTTTTGTAGTGCTCCTGCGAAAGCTGTAACGATAGGACAAGA

```

```

+1 ACV-PCRfragment.xdna          60      70      80      90     100
-32 W47R_Senegal                  ttgaaCGCGAACCTAGATAAGGTTTgctcatttcttgaggatgctttac
-21 Ng10ACV-R                      .....Y.....
-25 Ng08ACV-R                      .....T.....
-8 An.dirus4-R                    .....
-6 An.dirus3-R                    .....
+5 An.dirus3-F                    .....
+7 An.dirus4-F                    .....
+26 Ng08ACV-F                    .....T.....
+33 W47F_Senegal                  .....Y.....
+22 Ng10ACV-F                    .....Y.....
CONSENSUS                         TTTGAACGCGAACCTAGATAAGGTTTgctcatttcttgaggatgctttac

```

```

+1 ACV-PCRfragment.xdna          110     120     130     140     150
-32 W47R_Senegal                  caggatggTcgagcagcttacgctcgtagcAAAAATACATCCGCGTCA
-21 Ng10ACV-R                      .....
-25 Ng08ACV-R                      .....
-8 An.dirus4-R                    .....
-6 An.dirus3-R                    .....
+5 An.dirus3-F                    .....
+7 An.dirus4-F                    .....
+26 Ng08ACV-F                    .....
+33 W47F_Senegal                  .....
+22 Ng10ACV-F                    .....
CONSENSUS                         CAGGTATGGTTCGAGCACGTTACGCTCGTAGCACAAAATACATCCGCGTCA

```

```

+1 ACV-PCRfragment.xdna          160     170     180     190     200
-32 W47R_Senegal                  gccAAGTgTtAtctgacgagTtGATCAAATCAATGCTTTGCATTGTTTT
-21 Ng10ACV-R                      .....
-25 Ng08ACV-R                      .....
-8 An.dirus4-R                    .....
-6 An.dirus3-R                    .....
+5 An.dirus3-F                    .....
+7 An.dirus4-F                    .....
+26 Ng08ACV-F                    .....
+33 W47F_Senegal                  .....
+22 Ng10ACV-F                    .....
CONSENSUS                         GCCAAGTGTtAtctGACGAGTtGATCAAATCAATGCTTTGCATTGTTTT

```

```

+1 ACV-PCRfragment.xdna          210     220     230     240     250
-32 W47R_Senegal                  gatttGcttGttgattgaaaccaagTtctataagaccgctttcgcggtac
-21 Ng10ACV-R                      .....
-25 Ng08ACV-R                      .....
-8 An.dirus4-R                    .....
-6 An.dirus3-R                    .....
+5 An.dirus3-F                    .....
+7 An.dirus4-F                    .....
+26 Ng08ACV-F                    .....
+33 W47F_Senegal                  .....
+22 Ng10ACV-F                    .....
CONSENSUS                         GATTTGCTTGTtGATTGAAACCAAGTtctataagaccgctttcgcggtac

```

```

                260      270      280      290      300
+1 ACV-PCRfragment.xdna ttatagtggttgctctacgtgTTTTTCGGGTACAGTGAGCAAATAATTGAG
-32 W47R_Senegal .....
-21 Ng10ACV-R .....
-25 Ng08ACV-R .....
-8 An.dirus4-R .....
-6 An.dirus3-R .....
+5 An.dirus3-F .....
+7 An.dirus4-F .....
+26 Ng08ACV-F .....
+33 W47F_Senegal .....
+22 Ng10ACV-F .....
    CONSENSUS TTTATAGTGGTTGCTCTACGTGTTTTTCGGGTACAGTGAGCAAATAATTGAG

```

```

                310      320      330      340      350
+1 ACV-PCRfragment.xdna acagctatggacatgtatcgcgtaattagggctccaaggctcaaggtaa
-32 W47R_Senegal .....
-21 Ng10ACV-R .....
-25 Ng08ACV-R .....
-8 An.dirus4-R .....
-6 An.dirus3-R .....
+5 An.dirus3-F .....
+7 An.dirus4-F .....
+26 Ng08ACV-F .....
+33 W47F_Senegal .....
+22 Ng10ACV-F .....
    CONSENSUS ACAGCTATGGACATGTATCGCGTAATTAGGGCTCCAAGGCTCAAGGTAA

```

```

                360      370      380      390      400
+1 ACV-PCRfragment.xdna tatggaagatgctgTTTTCCATCCGTTGAACACGTGTGGAAAGTTGA
-32 W47R_Senegal .....
-21 Ng10ACV-R .....
-25 Ng08ACV-R .....
-8 An.dirus4-R .....
-6 An.dirus3-R .....
+5 An.dirus3-F .....
+7 An.dirus4-F .....
+26 Ng08ACV-F .....
+33 W47F_Senegal .....
+22 Ng10ACV-F .....
    CONSENSUS TATGGAAGATGCTGTTTTCCATCCGTTGAACACGTGTGGAAAGTTGA

```

```

                410      420      430      440      450
+1 ACV-PCRfragment.xdna ttttcctacttatcgtgtcctgtgtctcaagaaattaccagaaagaac
-32 W47R_Senegal .....
-21 Ng10ACV-R .....
-25 Ng08ACV-R .....
-8 An.dirus4-R .....
-6 An.dirus3-R .....
+5 An.dirus3-F .....
+7 An.dirus4-F .....
+26 Ng08ACV-F .....
+33 W47F_Senegal .....
+22 Ng10ACV-F .....
    CONSENSUS TTTTCCTACTTATCGCTGTCTGTCTCAAGAAATTACCAGAAAGAAC

```

```

                460      470      480      490
+1 ACV-PCRfragment.xdna gacgtagacactttcatgCGCAGGCTCGACAGCTTACCCAAAGC
-32 W47R_Senegal ..
-8 An.dirus4-R .....
-6 An.dirus3-R .....
+5 An.dirus3-F .....
+7 An.dirus4-F .....
+26 Ng08ACV-F .....
+33 W47F_Senegal .....
+22 Ng10ACV-F .....
    CONSENSUS GACGTAGACACTTTCATGCGCAGGCTCGACAGCTTACCCAAAGC

```
